# Supplementary material for: Remote sensing of young leaf photosynthetic capacity in tropical and subtropical evergreen broadleaved forests
Source: Copernicus journal article supplement (doi:10.5194/essd-2025-64), 2025-02-18
Supplement: Supplementary file [file essd-2025-64-AC2-supplement.pdf]

## Responses to reviewer 2#'s comments point by point

MS No.: essd-2025-64

Title: Remote sensing of young leaf photosynthetic capacity in tropical and subtropical evergreen broadleaved forests

Author(s): Xueqin Yang et al.

### General Comments of Reviewer 2#:

Maximum carboxylation rate at 25°C ( $V_{c,max25}$ ) is a key parameter determines the carbon sequestration rate through photosynthesis. It changes with leaf age and environmental conditions. On the basis of remote sensing data, this study produced the dataset of  $V_{c,max25}$  in tropical and subtropical evergreen broadleaved forests. This manuscript is interesting and well-written. After some modifications, it is publishable.

**Response:** *We appreciate the time and efforts of the editor and referees in reviewing this manuscript and the valuable suggestions offered. Please see our response to your comments in the supplement below.*

### Main concerns:

#### Comment 1:

Sections 3.1-3.3: See all the validation/comparison maps, the dissolved  $V_{c,max25}$  of young leaves performed consistent in tropical Africa and Asia, but differed a bit more across Amazon region. Please explain.

**Response:** *Thanks for your careful review. **Figure 4** shows that  $V_{c,max25}$  in the Amazon region exhibits a highly clustered distribution across sub-regions, whereas in the Congo and Asia regions, it follows a more continuous gradient pattern. To investigate the underlying causes, we analyzed the spatial distribution of plant functional types (PFTs) in tropical regions, focusing on the EBF fraction at the pixel level. As shown in **Figure R2**, more than 69.78% of the Amazon region has an EBF fraction exceeding 90%, compared to only 41.09% in Congo and 31.45% in tropical Asia. This indicating higher pixel purity and reduced canopy variability, which contributes to the more concentrated range of  $V_{c,max25}$  values. Furthermore, a comparison with the dry season onset map from Tang and Dubayah (2017) reveals a similar spatial pattern (**Figure R3**), suggesting that the identified sub-regions correspond to relatively homogeneous environmental conditions. This environmental uniformity results in similar plant growth conditions, leading to a more constrained  $V_{c,max25}$  distribution. Notably, sub-region A3, located in the northwestern Amazon near coastal and mountainous areas, forms two distinct clustering zones.*

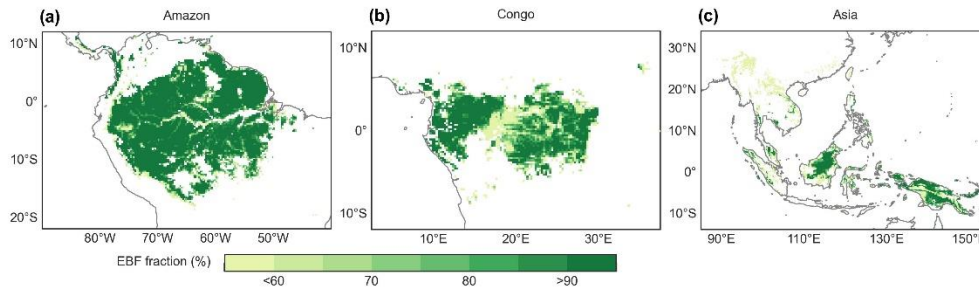

**Figure R2** Spatial pattern of evergreen broadleaf forests (EBF) fraction across tropical

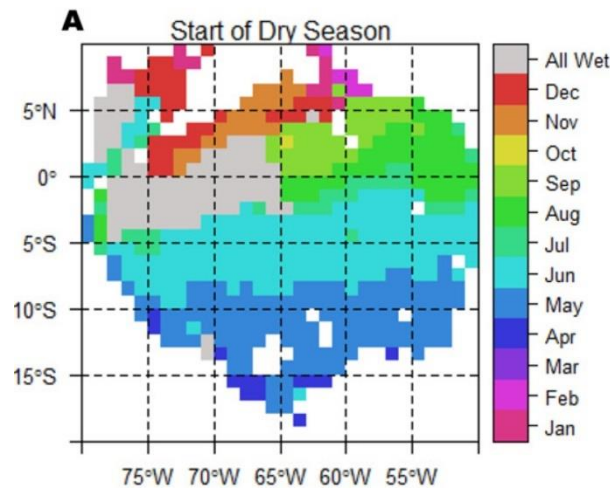

**Figure R3** Climate zones in Amazon identified according to start of dry season (cf. Tang and Dubayah, 2017)

We have added further explanations in section 3.2 to clarify the differences between the Amazon, and Congo, Asia regions:

“Across the Amazon, more than 69.78% of pixels have a high EBF fraction (>90%). The spatial clustering pattern aligns with the onset of the dry season (cf. Tang and Dubayah, 2017), suggesting that the clustering analysis effectively differentiates climate regions within the Amazon. The relatively homogeneous environmental conditions across these sub-regions create similar plant growth environments, leading to a more constrained range of  $V_{c,max25}$  values and pronounced clustering effects in sub-regions A1–A5. Notably, sub-region A3, located in the northwestern Amazon near coastal and mountainous areas, forms two distinct clustering zones.” (In revision lines 396–402)

#### Comment 2:

Section 3.4: Regarding the potential climatic drivers of the seasonality of  $V_{c,max25}$ . The authors only compared their seasonal patterns, while they did not establish an effective statistical model to quantify relationship. I would suggest authors adding such analyses.

**Response:** Thanks so much for pointing out this important question. We totally agree and thus did additional analyses completely following the reviewer’s suggestions.

Regarding the potential climatic drivers of  $V_{c,max25}$  seasonality, we actually establish a Random Forests (RF) model for entire tropical as well as for three major tropical forest regions to quantify the relationship between  $V_{c,max25}$  and three climate variables (SW, VPD and  $T_{mean}$ ). The results are presented in Figure 10 in the revised manuscript. Our findings reveal substantial regional differences in climatic drivers, with VPD primarily regulating  $V_{c,max25}$  in the Amazon and Congo regions, while  $T_{mean}$  plays a dominant role in Asia. However, at the tropical scale, SW emerges as the key primary controlling factor. To further quantify the relationships, we systematically analyzed the potential climatic drivers of  $V_{c,max25}$  seasonality across the 10 sub-regions identified in the clustering analysis. We have revised **section 3.4** as follows:

### **“3.4 Partial correlations between the seasonal $V_{c,max25}$ of young leaves and individual climatic factors**

To assess the climatic controls on  $V_{c,max25}$  of young leaves, we performed spatial partial correlation analyses on climate drivers such as vapor pressure deficit (VPD), air temperature ( $T_{mean}$ ), and downward shortwave solar radiation (SW) (**Fig. 9**), previously established as critical determinants of leaf phenology in TEFs (Yang et al., 2023; Yang et al., 2021; Li et al., 2021a). The  $V_{c,max25}$  of young leaves exhibited a strong correlation with the three climate drivers (**Fig. 9**). We then analyzed the relative importance of three climate drivers in influencing  $V_{c,max25}$  using the machine-learning model of the Random Forests (RF) method (**Fig. 10, section 2.5.3**). Shortwave radiation exhibited particularly notable positive correlations ( $R > 0.34$ ) with  $V_{c,max25}$  across almost all regions with the exception of Amazon sub-region R4 ( $R = 0.17$ ) (**Fig. S8**), and the shortwave radiation was also the most contributing factor (**Fig. 10a**). This underscoring the dominant role of radiation in regulating canopy photosynthesis in TEFs. Although seasonal temperature fluctuations were modest (**Fig. S7**), likely due to minor temperature gradients,  $T_{mean}$  still exhibited a positive correlation with  $V_{c,max25}$  of young leaves. However, at the global scale,  $T_{mean}$  had the least influence compared to VPD and SW (**Fig. 10a**). Notably, in the Asia region,  $T_{mean}$  emerged as the primary driver of  $V_{c,max25}$  variability and showed a strong positive correlation in the Asia sub-region R10 ( $R = 0.88$ , **Fig. S8**). Notably, VPD and  $T_{mean}$  exhibited negative correlations with  $V_{c,max25}$  across Congo, with VPD showing a strong negative relationship in sub-region Congo R7 ( $R = -0.70$ ) and  $T_{mean}$  in sub-region Congo R6 ( $R = -0.64$ ) (**Fig. S8**). These two factors primarily governed the spatial variability of  $V_{c,max25}$  across the Congo (**Fig. 10 c**). This variability primarily stems from the canopy turnover patterns, where leaf aging during rainy seasons reverses during dry periods (Li et al., 2021a; Yang et al., 2023; Yang et al., 2021). As a result, the seasonality of leaf photosynthetic capacity tended to show an inverse trend to the seasonality of the leaf age, as expected Chen et al. (2020).” (In revision lines 454-475)

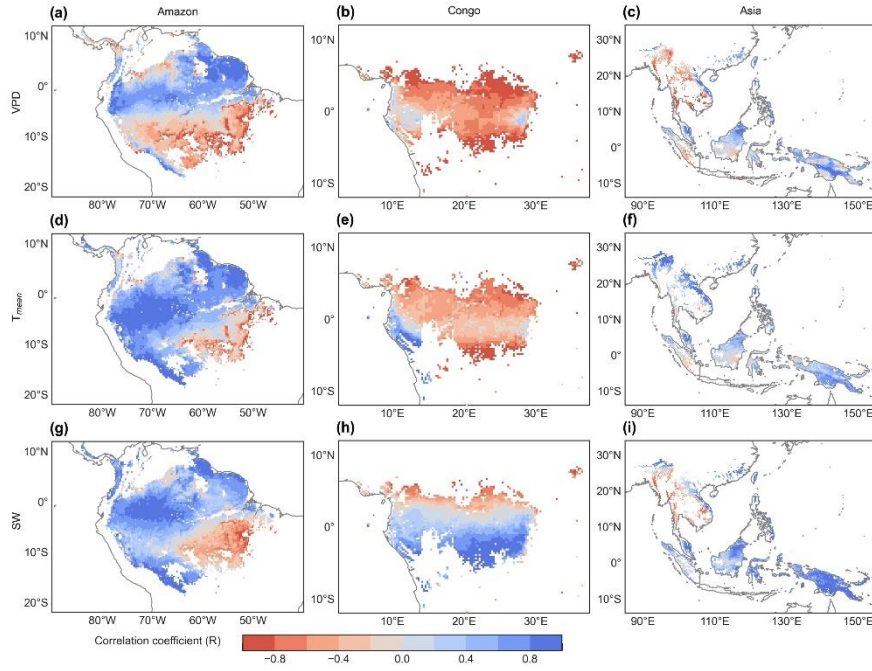

**Figure 9.** Spatial maps of correlation coefficient ( $R$ ) between the SIF-simulated monthly  $V_{c,max25}$  and vapor pressure deficit (VPD, **a-c**), air temperature ( $T_{mean}$ , **d-f**), and downward shortwave solar radiation (SW, **g-i**).

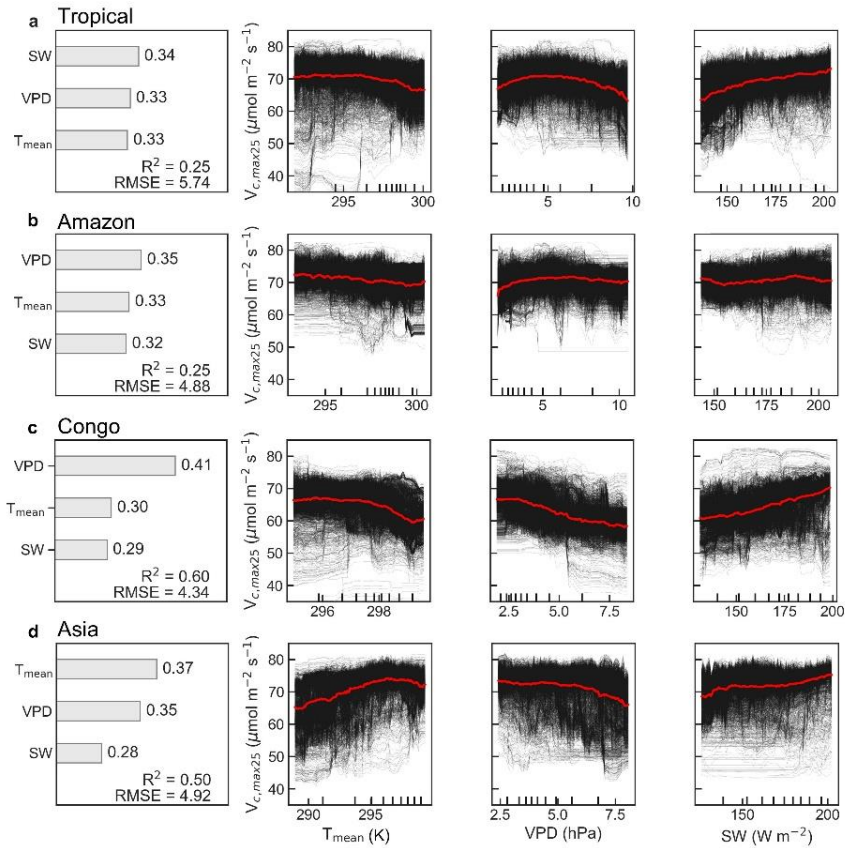

**Figure 10.** Climatic drivers of spatial variations in average  $V_{c,max25}$  of young leaves across the TEFs (**a**) and three major tropical forests regions (**b-d**). Contributions ( $\Phi$ ) of three

climate factors to the multiple-year-average  $V_{c,max25}$  using the random forest (RF) algorithm.  $R^2$  represents the coefficient of determination between simulated- and observed-  $V_{c,max25}$ . RMSE indicates the root mean standard error. Partial dependence plots (PDP) of the relationships between three climate drivers [ $T_{mean}$  (K),  $SW$  ( $W\ m^{-2}$ ),  $VPD$  (hPa)] and  $V_{c,max25}$ . Relations for each pixel are displayed in black lines and relations on regional average are shown in red lines.

### Comment 3:

Finally, authors should clarified the potential limitations and caveat of the data and method used for mapping the  $V_{c,max25}$  of young leaves in tropical forests. For instance, please add metric for quality control. And, assuming little seasonal variations of  $V_{c,max25}$  of old leaves may lead to overestimation/underestimation of the seasonal  $V_{c,max25}$  of young leaves. In addition, the lack of intensive validations across the pantropical forests may be another limitation.

**Response:** Thank you for your insightful comments. We have carefully considered your suggestions and have made the following revisions to address the concerns raised: (1) we have incorporated a detailed quality control (QC) metric to ensure the reliability of our methodology and prevent potential misuse of the data. The QC data are provided in section 2.6. (2) We have added statements and discussion in section 4 to acknowledge the potential limitations arising from assuming minimal seasonal variation in  $V_{c,max25}$  of old leaves and the lack of extensive validation across pantropical forests.

#### ● add quality control (QC) metric to prevent potential misuse

We provided information of data quality control (QC) for the  $V_{c,max25}$  of young leaves product to prevent data misuse. In the QC system (Table S5), data quality is divided into four levels: level 1 represents the highest quality; level 2 and level 3 represent good and acceptable quality, respectively; and level 4 warns to be used cautiously. This QC product is generated based on Pearson's correlation coefficients (R) and the root mean square error (RMSE), which were obtained by comparing the seasonal  $V_{c,max25}$  estimated from RTSIF- and GOSIF-derived GPP. Results showed that more than 91.5% of pixels are with QC at best and only less than 0.03% are with QC at level 3 and level 4. These details are elaborated in section 2.6 (In revision lines 350-356).

#### 2.6 Quality control (QC) for young leaves $V_{c,max25}$ product

We provided information on data quality control (QC) along with the  $V_{c,max25}$  of young leaves product. In the QC system (Table S5), data quality was divided into four levels: Level 1 represents the highest quality, Level 2 and Level 3 represent good and acceptable quality, respectively, and Level 4 should be used with caution. This QC product was generated based on Pearson's correlation coefficients (R) and the root mean square error (RMSE), which were obtained by comparing the seasonal  $V_{c,max25}$  estimated from RTSIF- and GOSIF-derived GPP.

**Table S5** Information of data quality control (QC) for the  $V_{c,max25}$  product

| QC class | QC value | R       | RMSE ( $\mu\text{mol}\ m^{-2}\ s^{-1}$ ) |
|----------|----------|---------|------------------------------------------|
| Best     | 1        | 0.6-1   | 0-10                                     |
| Good     | 2        | 0.4-0.6 | 10-20                                    |



|              |   |         |       |
|--------------|---|---------|-------|
| Acceptable   | 3 | 0.2-0.4 | 20-30 |
| Cautious use | 4 | <0.2    | >30   |

● **add caveat statement to warn potential uncertainties**

We have added caveat statements and uncertainties in section 4 to discuss the potential limitations of our assumptions and the constraints of data validation. In the section 4, some revised as follows:

“Notably, the link between the older leaves and  $V_{c,max25}$  remains poorly understood in TEFs due to limited field data (Chen et al., 2020). To address these simulation challenges, we treated  $V_{c,max25}$  of old leaves as a static value; potentially introducing errors in photosynthetic performance predictions. This simplification may also affect the accuracy of  $V_{c,max25}$  and GPP seasonality in ESMs (De Weirdt et al., 2012). Moreover, additional uncertainties stem from assumptions that neglect the spatial and temporal variations driven by the plant functional type diversity, which shifts with seasonal climate anomalies and high heterogeneity in diverse forest ecosystems. These generalizations could also introduce inaccuracies in simulating seasonal variations in  $V_{c,max25}$ . Reflecting the inherent variability in photosynthetic behavior across leaf ages, the data revealed two distinct responses: (1) certain species, such as *P. tomentosa* and *P. caimito*, exhibited marked reductions in  $V_{c,max25}$  with age, whereas (2) others, such as *M. angularis* and *V. parviflora*, maintained consistent  $V_{c,max25}$  values after reaching their peak. Menezes et al. (2022) identified a modest but significant correlation between the  $V_{c,max25}$  and leaf age due to these divergent patterns. Variations in the photosynthetic capacity at the ecosystem level could be influenced by species composition and the distribution of plant functional groups within forests.” (In revision lines 566-579)

“The new photosynthetic product successfully captures the characteristic bimodal patterns of  $V_{c,max25}$  with limited seasonal amplitude in these areas. To convert the SIF data into GPP, a constant coefficient was used, and  $V_{c,max25}$  was assumed to be uniformly distributed across all tropical evergreen forests, potentially introducing further uncertainties. This assumption was reflected in the MSD assessment, where the bias component was predominant, especially near the equator. Nevertheless, the impact of this on the seasonality of photosynthesis was minima; because the phase-dependent component of the RMSE remained relatively insignificant.” (In revision lines 552-558)

**Minor Comments:**

**Comment 1:** 1. The manuscript needs substantial review of the English style as there are some language mistakes, which makes the comprehension of the text difficult.

**Response:** We agree with the reviewer that it is essential to ensure that our manuscript is written clearly and effectively in English. We conducted a thorough review of our manuscript to address any language mistakes and improve the overall readability of the text.

**Comment 2:** 2. Line 21-22, Abstract: The research gap is not only the lack of quantification but also the absence of continuous, gridded data covering a large spatial range.

**Response:** We completely agree with the reviewer's comment and revised the argument as suggested:

*"Nevertheless, quantifying the leaf photosynthetic capacity of different age across TEFs remains challenging, especially when considering continuous temporal variations at continental scales" (In revision lines 22-23)*

**Comment 3:** 3. Line 23, Abstract: "neighborhood pixel" may be as "neighborhood pixels".

**Response:** Thanks, we revised it as suggested. (In revision line 24)

**Comment 4:** 4. Line 28, Abstract: format R values to two decimal places.

**Response:** Many thanks. The revised sentence was as follows:

*"Validations against in situ observations demonstrate that the newly developed  $V_{c,max25}$  products accurately capture the seasonality of young leaves in South America and subtropical Asia, with correlation coefficients of 0.84, 0.66, and 0.95, respectively." (In revision lines 28-30)*

**Comment 5:** 5. Line 58-60: Perhaps subordinate clauses can be used.

**Response:** Thanks for your careful review. The revised sentence was as follows:

*"Research on this issue remains limited and inconclusive, largely due to the complex interplay of seasonal constraints such as water availability and light, which affect leaf flushing and shedding processes across different climatic zones (Brando et al., 2010; Yang et al., 2021)." (In revision lines 57-60)*

**Comment 6:** 6. Line 100: Leaves are classified as young or mature based on 180 days, but it needs to be clarified which category includes the 180th day.

**Response:** Thanks for your valuable suggestions. The 180th day is classified to young leaves in this study. We modified the description as follows:

*"To address the aforementioned gaps in mapping  $V_{c,max25}$  of young leaves, we categorized the canopy foliage of TEFs into two distinct leaf age groups: young ( $\leq 180$  days) and old ( $> 180$  days) leaves." (In revision lines 96-97)*

**Comment 7:** 7. Line 176: The format of Equation (1) may be better like:  $GPP_{total} = LAI_Y \times A_{sat\_Y} + LAI_O \times A_{sat\_O}$

**Response:** Thanks for your carefulness and nice suggestions. We have revised the Equation (1) and the related description as follows:

*"The total GPP was simulated using the FvCB photochemical model by combining the LAI groups (young leaf  $LAI_Y$  vs. old leaf  $LAI_O$ ; Equation 1) and the corresponding net assimilation rates of  $CO_2$  (young and mature  $A_{n,sat\_Y}$  vs. old leaf  $A_{n,sat\_O}$ ; Equation 1) (Farquhar et al., 1980).*

$$GPP_{total} = LAI_Y \times A_{n,sat\_Y} + LAI_O \times A_{n,sat\_O} \quad (1)$$

*where  $LAI_Y$  represents the LAI of young leaves ( $\leq 180$  days) and  $LAI_O$  represents the LAI of old leaves ( $> 180$  days).  $A_{n,sat\_Y}$  and  $A_{n,sat\_O}$  represent the net  $CO_2$  assimilation rates of young and old leaves, respectively. The sum of  $LAI_Y$  and  $LAI_O$  was set as the total*

canopy LAI.  $GPP_{total}$  refers to the total gross primary production of the canopy.” (In revision lines 166-173)

**Comment 8:** 8. Line 182: Figure 2. Remove the background color

**Response:** Many thanks. We removed the background color to clearly display the procedures as follows:

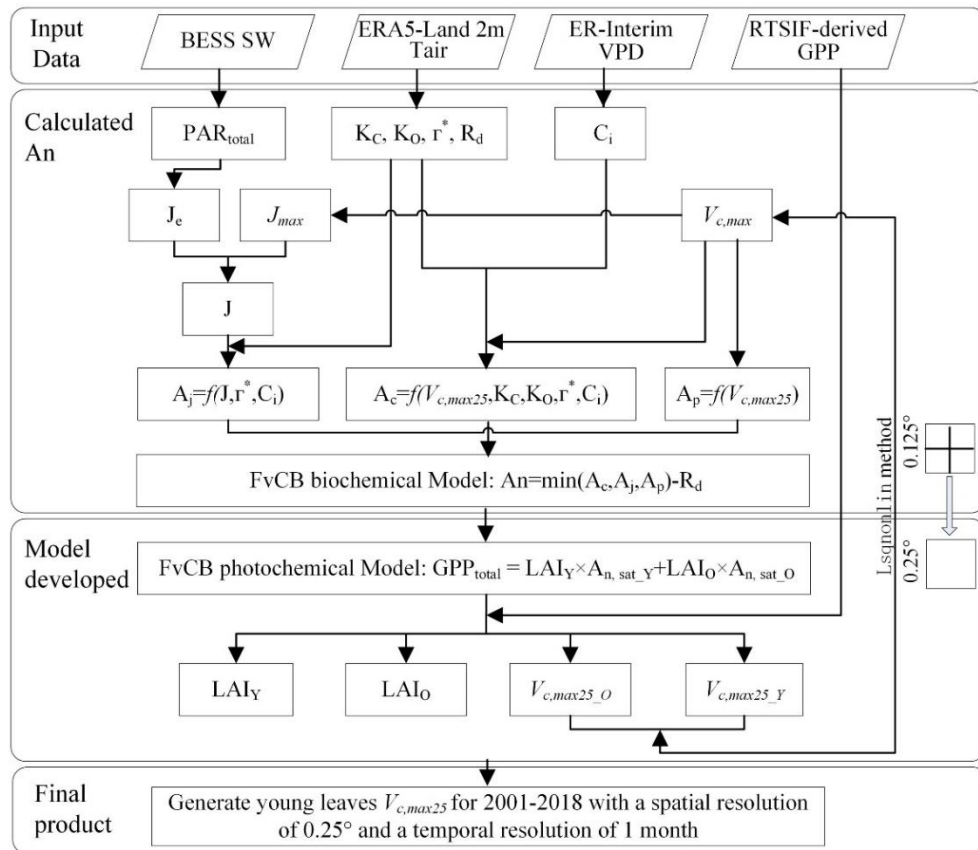

**Figure 2.** Procedures for mapping the  $V_{c,max25}$  of young leaves using a neighbor-based approach.

**Comment 9:** 9. Line 201-203: What constraints including in the nonlinear least squares approach?

**Response:** Thank you for raising this important question. In the nonlinear least squares, two constraints were applied: (1) the  $V_{c,max25}$  must be positive ( $V_{c,max25} > 0$ ), and (2) the optimal  $V_{c,max25}$  was determined by minimizing the residual. Further details on these constraints are added in section 2.4 (Methods for simulating the  $V_{c,max25}$  of young leaves) of the revised manuscript.

“The LAI and  $V_{c,max25}$  of young leaves were estimated using nonlinear least squares and constraints on the basis of the GPP values with the four neighboring pixels according to Equation 1. The optimal  $V_{c,max25}$  was determined by minimizing the residual while satisfying the positivity constraint (i.e.,  $V_{c,max25} > 0$ ).” (In revision lines 192-195)



**Comment 10:** 10. Line 381: There is a typo “yong” in the figure

**Response:** Thanks for your carefulness suggestions. We have corrected the legend as “Simulated  $V_{c,max25}$  of young leaves”.

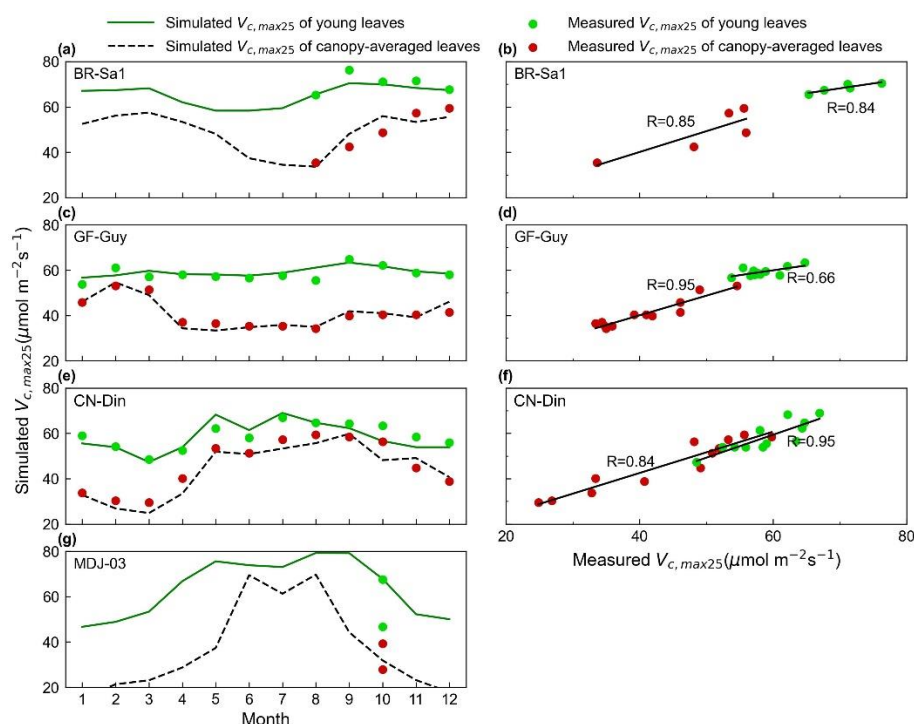

**Figure 3.** Validations of simulated seasonal  $V_{c,max25}$  for all canopy leaves and young leaves with in situ observations. The green lines and green dots are the seasonal young leaf  $V_{c,max25}$  simulated from RTSIF derived GPP by the proposed method. The black line and red dots are the mean leaf age  $V_{c,max25}$  values from the simulations and in situ observations, respectively. Simulated  $V_{c,max25}$  denoted as the young leaf  $V_{c,max25}$  simulated from RTSIF-derived GPP by using the new proposed method. Mean  $V_{c,max25}$  denoted as the mean leaves age  $V_{c,max25}$ .

**Comment 11:** 11. Lines 163/282/388/409: Change “...the young leaves  $V_{c,max25}$ ...” to “.... the  $V_{c,max25}$  of young leaves...” Please also check other similar mistakes in the manuscript thoroughly.

**Response:** Thank you for these valuable suggestions. We have replaced the description (i.e., the young leaves  $V_{c,max25}$ ) with your suggestion (i.e., the  $V_{c,max25}$  of young leaves). To be cautious, we also corrected other sentences with similar grammar issues in revised manuscript.

Line 163 (In revision line 156): “2.4 Methods for simulating the  $V_{c,max25}$  of young leaves”

Line 282 (In revision line 276): “2.5 Methods for evaluating the simulated the  $V_{c,max25}$  of young leaves”

Line 388 (In revision lines 393-394): “3.2 Validation of the  $V_{c,max25}$  of young leaves simulated from RTSIF-derived GPP against that dissolved from GOSIF-derived GPP”

Line 409 (In revision lines 415-416): “Figure 4 Comparisons of the  $V_{c,max25}$  of young leaves simulated from RTSIF-derived GPP against that dissolved from GOSIF-derived

**GPP”**

**Comment 12:** 12. Figure 10: The scale of  $T_{air}$  should be appropriately reduced to display seasonal dynamics more effectively.

**Response:** Thanks for your careful review. We revised the scale to clearly display the seasonal dynamics of climatic variables.

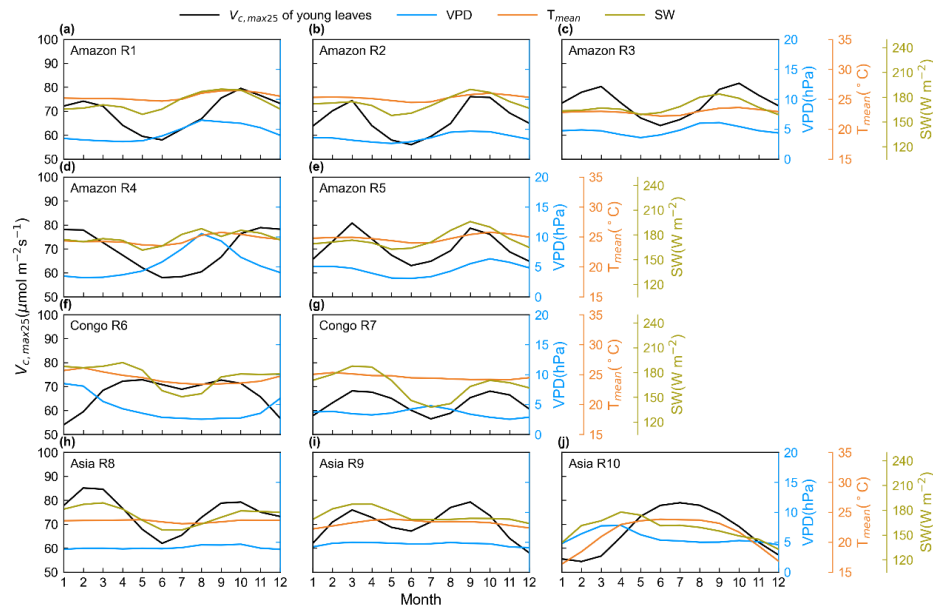

**Figure S7.** Seasonality of  $V_{c,max25}$  of young leaves, air temperature ( $T_{air}$ ), vapor pressure deficit (VPD) and downward shortwave solar radiation (SW) in the ten sub-regions classified using the K-means clustering analysis method.

**Comment 13:** 13. Figure S5, S6: Map of Congo in Jun. in Figure S5 should be smaller and this in Oct. in Figure S6 may be not show complete. Please check all maps in supplementary material.

**Response:** Thanks for your careful review. In the revised manuscript, we reproduced Figs. S8-10 (in revision Figs. S10-S12) with unified format to eliminate the inconsistencies of spatial scale. To be cautious, we also reproduced and carefully checked all maps in revised manuscript.

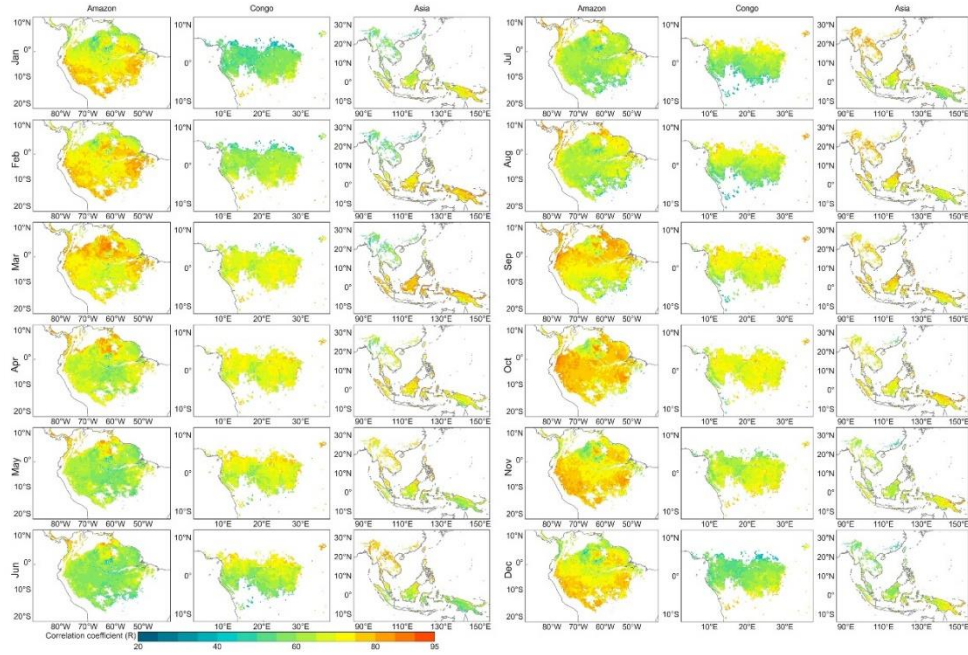

**Figure S10.** Spatial distributions and seasonal changes of young leaf  $V_{c,max25}$  in TEFs derived from RT-SIF (2001–2018). White areas are missing data.

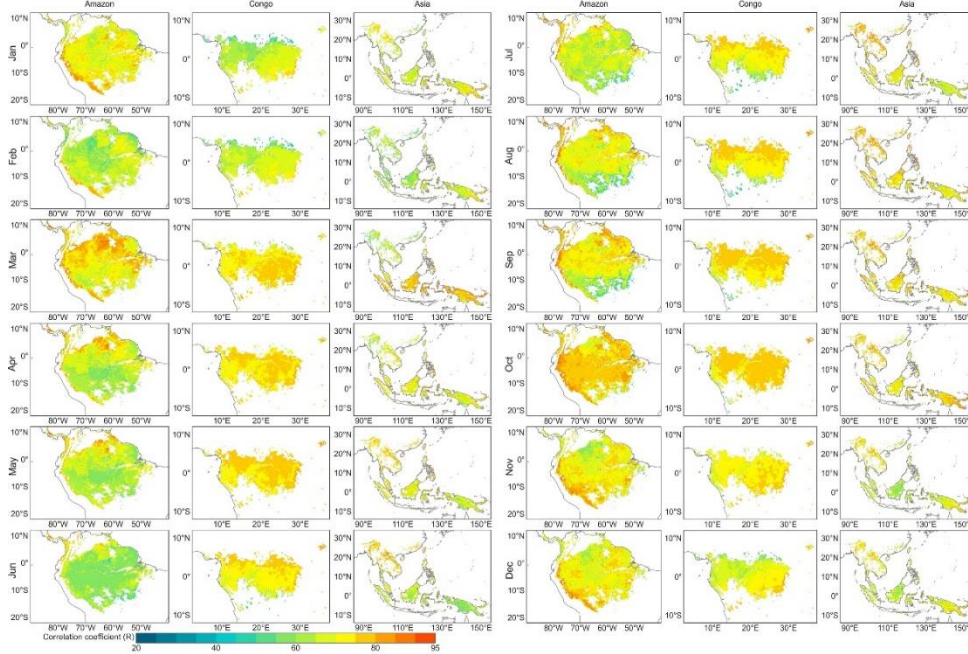

**Figure S11.** Spatial distributions and seasonal changes of young leaf  $V_{c,max25}$  in TEFs derived from Go-SIF (2001–2018). White areas are missing data.

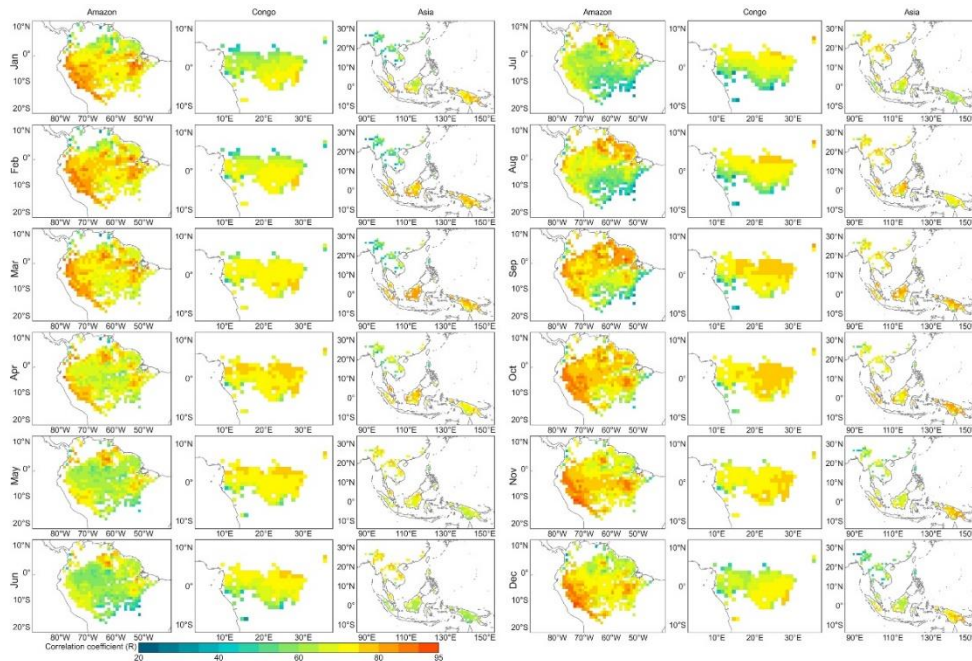

**Figure S12.** Spatial distributions and seasonal changes of young leaf  $V_{c,max25}$  in TEFs derived from FLUXCOM (2001–2013). White areas are missing data. Black dots are invalid value.

**Comment 14:** 14. Line 325-326: ‘Keep iterating until there is no change to the centroids. i.e. assignment of data points to clusters isn’t changing’. May rephrase.

**Response:** Many thanks. We have implemented comprehensive revisions, with particular attention to lexical precision and grammatical accuracy throughout the document. As suggested, we rephrased this sentence as follows:

“Iterate until convergence (i.e., cluster assignments remain unchanged between iterations).” (In revision line 317)

**Comment 15:** 15. Line 342: the mean values (V and U).

**Response:** Thanks, we revised it as suggested.

“...and  $\bar{V}$  and  $\bar{U}$  are the mean values of the simulated and observed in situ measurements  $V_{c,max25}$ .” (In revision lines 343-344)

**Comment 16:** 16. Line 352: the blank between 5.984° and S.

**Response:** Many thanks. We deleted the blank and thoroughly proofread the manuscript to correct the similar typographical errors.

“...MDJ-03 site in Congo (5.98°S; 12.87°E)...” (In revision lines 361-362)

**Comment 17:** 17. Greater attention should be devoted to the details of the figures in the manuscript. For example, The bolded font in Fig1 and Fig 3b. The labels of latitude and longitude in Figures 5-9 should be unified. Please standardize the style of all figures throughout the manuscript, particularly ensuring consistency in the map display, including the axes and other elements.



**Response:** Thank you for these valuable suggestions. We have conducted an additional check to rectify these issues. In the revised manuscript, we reproduced all figures with unified format to eliminate formatting inconsistencies and typos. Specifically, we uniformed the font in each figure like Figs 1 and 3. We also revised the labels and scale of all figure to clearly display our result. Meanwhile, the same intervals of latitude and longitude and related labels were adopted for the all maps to ensuring consistency.

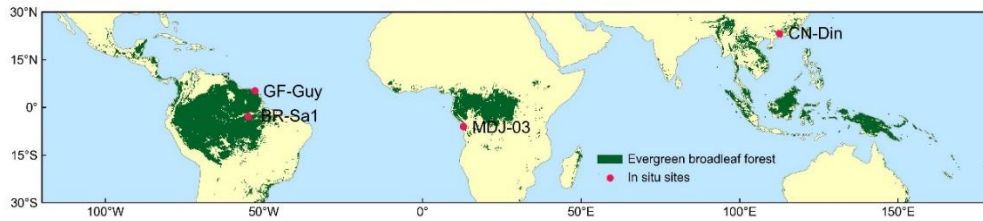

**Figure 1.** Tropical and subtropical broadleaved evergreen forests (TEFs) and in situ observation sites. The studied TEFs is determined as those labeled as evergreen broadleaf forest (EBF) from the MODIS land cover maps at a 0.05° spatial resolution. The red dots are in situ observation sites of  $V_{c,max25}$ .

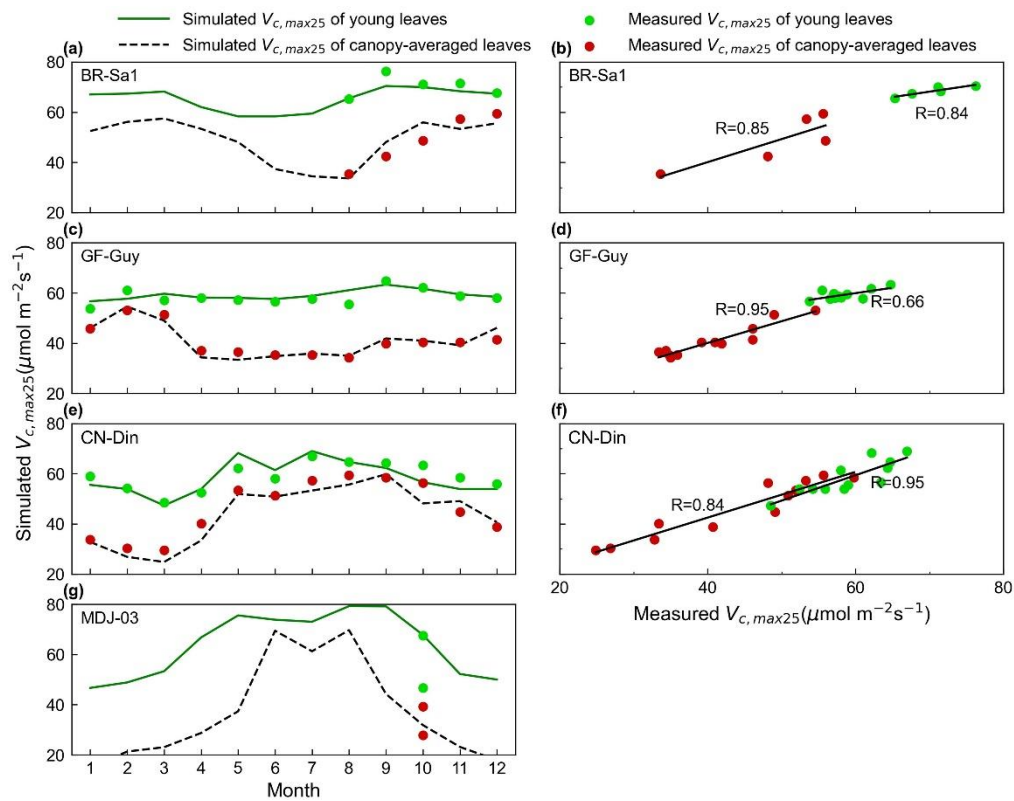

**Figure 3.** Validations of simulated seasonal  $V_{c,max25}$  for canopy-averaged leaves and young leaves with in situ observations. The green lines and green dots are the seasonal  $V_{c,max25}$  of young leaf simulated from RTSIF derived GPP by the proposed method. The black line and red dots are the mean leaf age  $V_{c,max25}$  values from the simulations and in situ observations, respectively. Simulated  $V_{c,max25}$  denoted as the  $V_{c,max25}$  of young leaf simulated from RTSIF-derived GPP by using the new proposed method. Mean  $V_{c,max25}$  denoted as the mean leaves age  $V_{c,max25}$ .



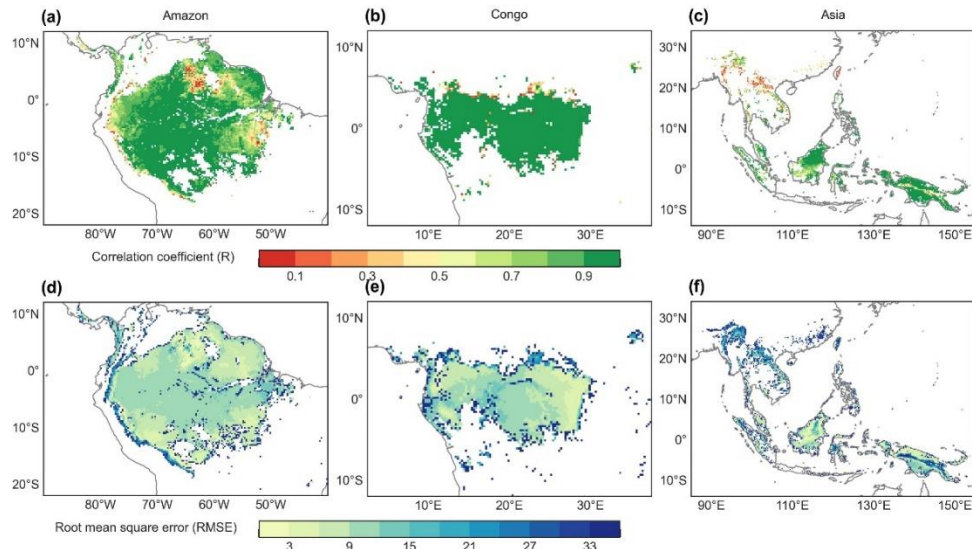

**Figure 5.** The root mean square error (RMSE) and correlation coefficient (R) between the  $V_{c,max25}$  of young leaves derived from RTSIF-derived GPP and that dissolved from GOSIF-derived GPP.

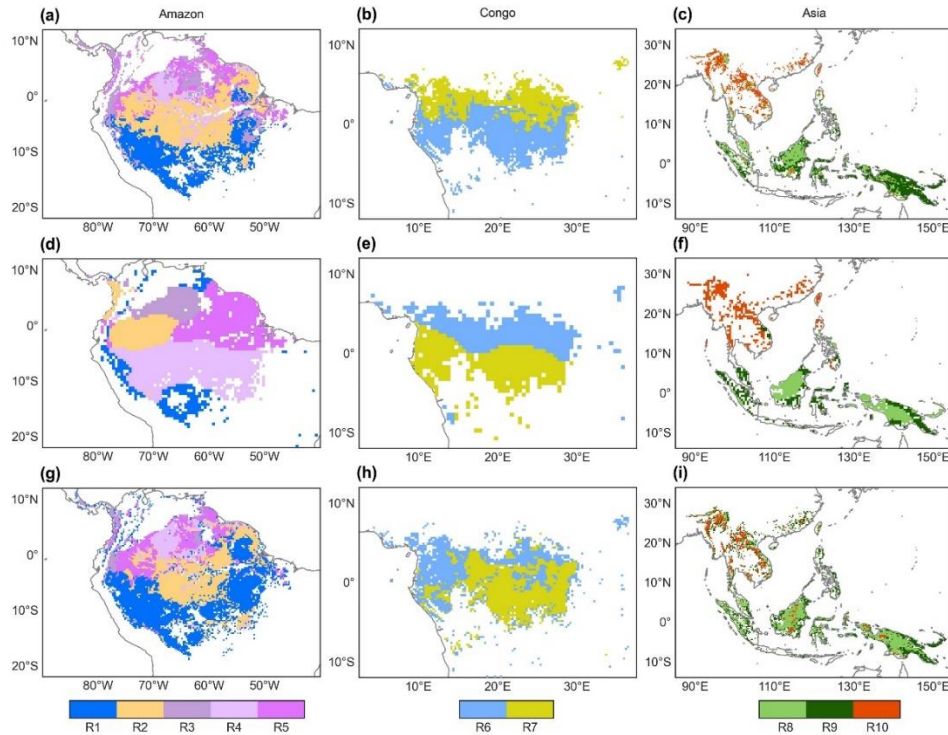

**Figure 6.** Comparison of sub-regions of the  $V_{c,max25}$  of young leaf (a-c) with those of climatic factors classified by the K-means clustering analysis (d-f) analyzed by Chen et al. (2021), and those of the Leaf-age-dependent leaf area index seasonality product (Lad-LAI) (g-i) developed by Yang et al. (2023).

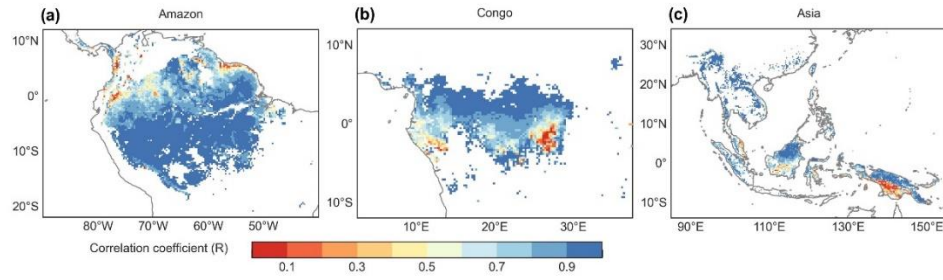

**Figure 7.** Spatial maps of the correlation coefficient ( $R$ ) between the monthly simulated  $V_{c,max25}$  and the Leaf-age-dependent leaf area index seasonality product (Lad-LAI) developed by Yang et al. (2023).

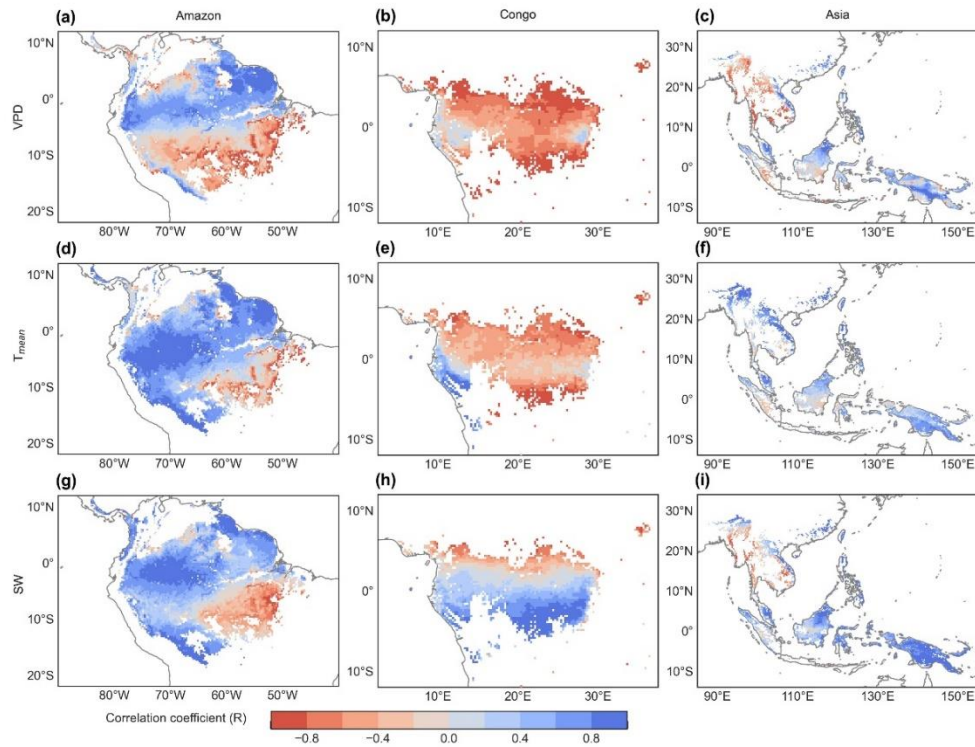

**Figure 9.** Spatial maps of correlation coefficient ( $R$ ) between the SIF-simulated monthly  $V_{c,max25}$  and climatic and phenological patterns. a, d and g are the spatial maps of correlation coefficient between  $V_{c,max25}$  and vapor pressure deficit (VPD); b, e and h are the spatial maps of correlation coefficient between  $V_{c,max25}$  and air temperature ( $T_{mean}$ ); c, f and i are the spatial maps of correlation coefficient between  $V_{c,max25}$  and downward shortwave solar radiation (SW)
